# Supplementary material for: Pairing of competitive and topologically distinct regulatory modules enhances patterned gene expression
Source: PubMed Central journal article supplement — Mol Syst Biol. 2008 Feb 12;4:163. doi: 10.1038/msb.2008.6 (PMC2267734; doi:10.1038/msb.2008.6), 2008-02-12
Supplement: msb20086-s1.pdf [file msb20086-s1.pdf]

## Supplemental Information

### Pairing competitive and topologically distinct regulatory modules enhances patterned gene expression

Itai Yanai<sup>1,8</sup>, L. Ryan Baugh<sup>1,5,8</sup>, Jessica J. Smith<sup>1,6</sup>, Casey Roehrig<sup>1</sup>, Shai S. Shen-Orr<sup>1</sup>,  
Julia M. Claggett<sup>1,7</sup>, Andrew A. Hill<sup>2</sup>, Donna K. Slonim<sup>3,4</sup>, and Craig P. Hunter<sup>1</sup>

<sup>1</sup>Department of Molecular and Cellular Biology, Harvard University, Cambridge, MA 02138, USA

<sup>2</sup>Biological Technologies, Wyeth Research, Cambridge, MA 02140, USA

<sup>3</sup>Department of Computer Science, Tufts University, Medford, MA 02155, USA

<sup>4</sup>Department of Pathology, Tufts University School of Medicine, Boston, MA 02111, USA

<sup>5</sup>Present address: Biology Division, California Institute of Technology, Pasadena, CA 91125, USA

<sup>6</sup>Present address: Industry Canada, 50 Rue Victoria, Gatineau QC K1A 0C9

<sup>7</sup>Present address: Department of Biology, University of California, San Diego, CA 92093, USA

<sup>8</sup>These authors contributed equally to this work.

This file contains:

Supplementary Table 1. Perturbation matrix data.

Supplementary Figure 1. Principal components analysis (PCA) of the effect of each TF knockdown at different stages upon C-lineage enriched genes.

Supplementary Figure 2. Reproducibility and strength of yeast-1-hybrid interactions.

**Supplementary Table 1. Perturbation matrix data**

| TF expression  | Stage (number of C cells) | MEAN -no perturbation<br>( <i>mex-3</i> -/-) | 1SD - no perturbation<br>( <i>mex-3</i> -/-) | <i>pal-1</i> | <i>tbx-8,9</i> | <i>elt-1</i> | <i>lin-26</i> | <i>nhr-25</i> | <i>elt-3</i> | <i>hnd-1</i> | <i>hlh-1</i> | <i>unc-120</i> | <i>scrt-1</i> | <i>vab-7</i> | <i>nob-1</i> |
|----------------|---------------------------|----------------------------------------------|----------------------------------------------|--------------|----------------|--------------|---------------|---------------|--------------|--------------|--------------|----------------|---------------|--------------|--------------|
|                | 16C                       | 32C                                          | 48C                                          | 16C          | 32C            | 48C          | 16C           | 32C           | 48C          | 16C          | 32C          | 48C            | 16C           | 32C          | 48C          |
| <i>pal-1</i>   | 16C                       | 1402                                         | 173.3                                        | 42           | 548            | 1670         | NA            | NA            | NA           | 1395         | NA           | NA             | 1732          | NA           | NA           |
|                | 32C                       | 1022                                         | 199                                          | 50           | NA             | 883          | 1249          | 1071          | 1276         | 889          | 926          | 1178           | 860           | 770          | 1202         |
|                | 48C                       | 441                                          | 167                                          | 184          | NA             | NA           | 504           | 603           | 379          | NA           | 307          | 517            | NA            | 287          | 426          |
| <i>tbx-9</i>   | 16C                       | 210                                          | 46.8                                         | 128          | 63             | 125          | NA            | NA            | NA           | 223          | NA           | NA             | 132           | NA           | NA           |
|                | 32C                       | 85                                           | 47.5                                         | 114          | NA             | 69           | 120           | 124           | 143          | 87           | 109          | 97             | 93            | 164          | 88           |
|                | 48C                       | 155                                          | 22                                           | 81           | NA             | NA           | 74            | 103           | 110          | NA           | 130          | 141            | NA            | 108          | 66           |
| <i>elt-1</i>   | 16C                       | 69                                           | 10.6                                         | 74           | 114            | 31           | NA            | NA            | NA           | 124          | NA           | NA             | 270           | NA           | NA           |
|                | 32C                       | 62                                           | 15.9                                         | 49           | NA             | 16           | 112           | 87            | 131          | 72           | 123          | 96             | 53            | 91           | 129          |
|                | 48C                       | 72                                           | 2                                            | 92           | NA             | NA           | 121           | 107           | 100          | NA           | 107          | 90             | NA            | 61           | 112          |
| <i>lin-26</i>  | 16C                       | 98                                           | 8.4                                          | 43           | 60             | 76           | NA            | NA            | NA           | 240          | NA           | NA             | 149           | NA           | NA           |
|                | 32C                       | 256                                          | 29.8                                         | 192          | NA             | 103          | 60            | 268           | 315          | 337          | 506          | 334            | 254           | 352          | 421          |
|                | 48C                       | 212                                          | 110.2                                        | 288          | NA             | NA           | 84            | 262           | 375          | NA           | 345          | 274            | NA            | 349          | 395          |
| <i>nhr-25</i>  | 16C                       | 21                                           | 0.1                                          | 11           | 15             | 20           | NA            | NA            | NA           | 28           | NA           | NA             | 28            | NA           | NA           |
|                | 32C                       | 25                                           | 5.8                                          | 15           | NA             | 18           | 32            | 18            | 47           | 32           | 50           | 39             | 43            | 29           | 47           |
|                | 48C                       | 16                                           | 1.3                                          | 21           | NA             | NA           | 32            | 15            | 22           | NA           | 18           | 19             | NA            | 17           | 24           |
| <i>elt-3</i>   | 16C                       | 78                                           | 10.2                                         | 67           | 41             | 41           | NA            | NA            | NA           | 147          | NA           | NA             | 77            | NA           | NA           |
|                | 32C                       | 162                                          | 13.5                                         | 60           | NA             | 43           | 184           | 294           | 238          | 288          | 465          | 287            | 284           | 304          | 277          |
|                | 48C                       | 669                                          | 273.2                                        | 51           | NA             | NA           | 542           | 657           | 402          | NA           | 714          | 716            | NA            | 799          | 614          |
| <i>hnd-1</i>   | 16C                       | 42                                           | 31                                           | 8            | 17             | 47           | NA            | NA            | NA           | 11           | NA           | NA             | 65            | NA           | NA           |
|                | 32C                       | 73                                           | 2.3                                          | 13           | NA             | 105          | 91            | 99            | 120          | 7            | 67           | 88             | 58            | 80           | 100          |
|                | 48C                       | 60                                           | 1.5                                          | 9            | NA             | NA           | 41            | 47            | 47           | NA           | 20           | 30             | NA            | 20           | 35           |
| <i>hlh-1</i>   | 16C                       | 65                                           | 21.7                                         | 3            | 20             | 254          | NA            | NA            | NA           | 216          | NA           | NA             | 76            | NA           | NA           |
|                | 32C                       | 304                                          | 13.7                                         | 14           | NA             | 188          | 244           | 161           | 231          | 158          | 21           | 223            | 171           | 117          | 200          |
|                | 48C                       | 61                                           | 3.7                                          | 20           | NA             | NA           | 138           | 118           | 95           | NA           | 26           | 107            | NA            | 81           | 98           |
| <i>unc-120</i> | 16C                       | 1195                                         | 84.7                                         | 2340         | 1299           | 3828         | NA            | NA            | NA           | 1136         | NA           | NA             | 773           | NA           | NA           |
|                | 32C                       | 1090                                         | 30.7                                         | 2956         | NA             | 1391         | 1059          | 725           | 1261         | 780          | 733          | 685            | 1581          | 2808         | 514          |
|                | 48C                       | 1246                                         | 27.1                                         | 1576         | NA             | NA           | 347           | 601           | 698          | NA           | 1731         | 930            | NA            | 1197         | 1326         |
| <i>scrt-1</i>  | 16C                       | 32                                           | 15.9                                         | 10           | 16             | 11           | NA            | NA            | NA           | 23           | NA           | NA             | 11            | NA           | NA           |
|                | 32C                       | 9                                            | 0.9                                          | 11           | NA             | 7            | 6             | 8             | 9            | 10           | 7            | 8              | 14            | 8            | 7            |
|                | 48C                       | 14                                           | 1.7                                          | 13           | NA             | NA           | 5             | 10            | 5            | NA           | 7            | 7              | NA            | 7            | 6            |
| <i>vab-7</i>   | 16C                       | 61                                           | 37.1                                         | 5            | 7              | 13           | NA            | NA            | NA           | 20           | NA           | NA             | 26            | NA           | NA           |
|                | 32C                       | 27                                           | 8.9                                          | 5            | NA             | 33           | 34            | 22            | 35           | 45           | 16           | 16             | 9             | 13           | 29           |
|                | 48C                       | 21                                           | 1.4                                          | 5            | NA             | NA           | 33            | 11            | 15           | NA           | 21           | 38             | NA            | 5            | 12           |
| <i>nob-1</i>   | 16C                       | 68                                           | 8.1                                          | 23           | 45             | 169          | NA            | NA            | NA           | 223          | NA           | NA             | 100           | NA           | NA           |
|                | 32C                       | 230                                          | 15.5                                         | 70           | NA             | 177          | 330           | 337           | 293          | 243          | 408          | 420            | 267           | 177          | 111          |
|                | 48C                       | 211                                          | 27.7                                         | 96           | NA             | NA           | 267           | 187           | 190          | NA           | 136          | 246            | NA            | 108          | 27           |

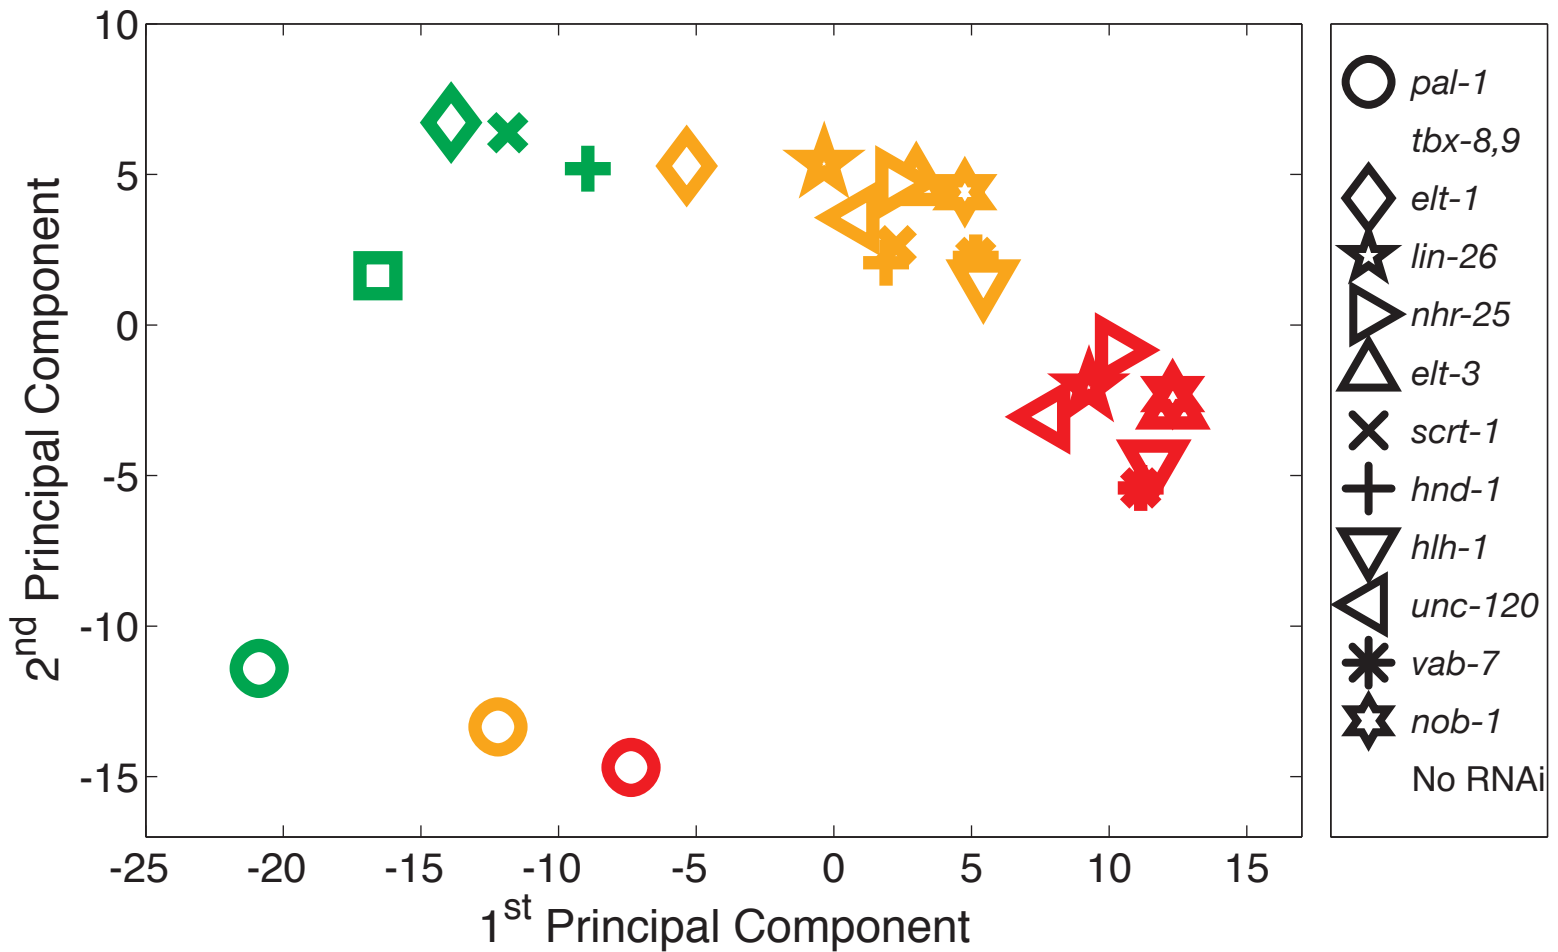

**Supplementary Figure 1. Principal components analysis (PCA) of the effect of each TF knockdown at different stages upon C-lineage enriched genes**

A matrix was constructed for the expression intensities of C lineage enriched genes (453 probesets, Baugh et al. 2005a) across the 27 samples indicated in the plot. Principal components analysis was computed on this matrix using the Matlab 'princomp' command and the scores of the first two components are plotted here. The first component (50.4% of the variation) distinguishes developmental time (color), while the second component (18.2% of the variation) appears to distinguish failure of the network by *pal-1*(RNAi) and *tbx-8,9* (RNAi) from the other perturbations.

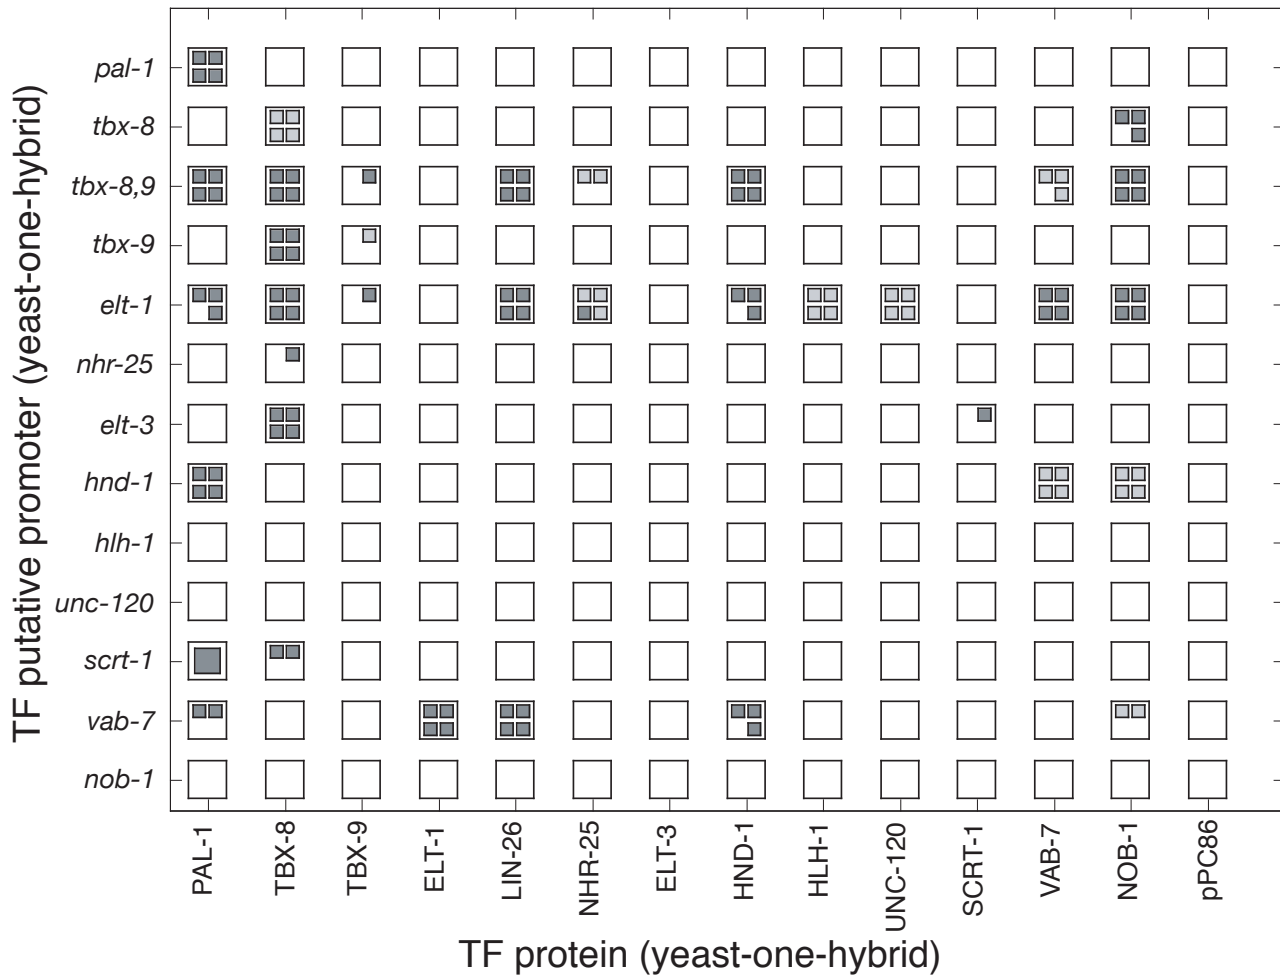

Supplementary Figure 2. **Reproducibility and strength of yeast-1-hybrid interactions.** For each transcription factor/promoter region pair (see exceptions below), four colonies were patched onto HIS- selective medium or tested for  $\beta$ -gal activity, as appropriate to the reporter used for each promoter region tested (see Experimental Procedures). Each subdivided square presents the results for all four patches, where each subdivision represents a single patch. Dark grey indicates robust growth/ $\beta$ -gal staining, light grey indicates weak growth/staining, and white indicates a lack of growth/staining detectable above background. For several combinations with the *scr-1* promoter (PAL-1, SCRT-1, ELT-1, TBX-8, and UNC-120) yeast were plated onto selective medium immediately after transformation and assayed for growth as colonies. A portion of each transformation was plated onto non-selective medium to confirm viability of cells after transformation. Of the combinations tested in this way, only PAL-1 allowed growth on selective medium.
